# Supplementary material for: Reaction of Partially Methylated Polygalacturonic Acid with Iron(III) Chloride and Characterization of a New Mixed Chloride–Polygalacturonate Complex
Source: MDPI journal article supplement (doi:10.3390/molecules29040890), 2024-02-17
Supplement: s1 [file s1]

# **Reaction of partially methylated polygalacturonic acid with iron(III) chloride and characterization of a new mixed chloride–polygalacturonate complex**

**László Kótai<sup>1\*</sup>, Károly Lázár<sup>2</sup>, László Ferenc Kiss<sup>3</sup>, and Klára Szentmihályi<sup>1</sup>**

<sup>1</sup>HUN-REN, Institute of Materials and Environmental Chemistry, Research Centre for Natural Sciences, H-1117 Budapest, Magyar tudósok körútja 2, Hungary

<sup>2</sup>HUN-REN, Centre for Energy Research, EKBI, Konkoly Thege Miklós út, 29-33, Budapest, 1121, Hungary

<sup>3</sup>HUN-REN Wigner Research Centre for Physics, Budapest, H-1525, Hungary

\*Correspondence: kotai.laszlo@ttk.hu;

Table S1 The acid capacity of samples containing polygalacturonic acid.

| Conditions of PGA preparation                                         | Ion exchange temperature, °C | pH value of the ion-exchanged reaction mixture | Acid capacity of the samples, mekv/g | Relative acidity of the samples, %* |
|-----------------------------------------------------------------------|------------------------------|------------------------------------------------|--------------------------------------|-------------------------------------|
| Commercial PGA                                                        | -                            | -                                              | 5.1                                  | 100                                 |
| 3 M NaOH, pH=12.2, 1 h, room temperature (Sample A)                   | 25                           | 2.84                                           | 3.6                                  | 71                                  |
|                                                                       |                              | 2.64                                           | 4.1                                  | 80                                  |
| 1 M NaOH, pH=12.2, 1 h, room temperature                              | 25                           | 2.86                                           | 2.9                                  | 57                                  |
|                                                                       |                              | 2.28                                           | 4.1                                  | 80                                  |
| 0.5 M NaOH, pH=12.1, 1 h, room temperature (Sample C)                 | 25                           | 3.31                                           | 2.6                                  | 51                                  |
|                                                                       |                              | 2.23                                           | 3.9                                  | 76                                  |
| 1 M NaOH, pH=12.0, 1 h, the reaction temperature was 50 °C (Sample D) | 25                           | 2.50                                           | 5.4                                  | 106                                 |
| 1 M NaOH, pH=12.0, 1 h, the reaction temperature was 50 °C (Sample E) | 45-50                        | 3.44                                           | 2.9                                  | 57                                  |
|                                                                       | 45-50                        | 2.55                                           | 3.7                                  | 73                                  |
|                                                                       | 45-50                        | 2.04                                           | 5.7                                  | 112                                 |
| 1 M NaOH, pH=12.0, 1 h, the reaction temperature was 75 °C (Sample F) | 70-75                        | 3.50                                           | 2.9                                  | 57                                  |
|                                                                       | 70-75                        | 2.55                                           | 4.1                                  | 80                                  |
|                                                                       | 70-75                        | 1.88                                           | 5.9                                  | 116                                 |

Table S2 Composition of compound 2.

|                                                     |        |
|-----------------------------------------------------|--------|
| Overall Fe content                                  | 9.95 % |
| Fe <sup>III</sup> content                           | 9.62 % |
| Fe <sup>II</sup> content                            | 0.33 % |
| Carbon content                                      | 29.4 % |
| Chloride ion content                                | 4.7 %  |
| PG ring/Fe ratio from chloride titration            | 2.12   |
| PG ring/Fe ratio from CHN analysis                  | 2.11   |
| Carboxylic acid/methylated carboxylate ratio in PGA | 1:1    |

Table S3 Mössbauer parameters of compound 2\* measured at room temperature.

| Compound                     | Component             | IS, mm/s | QS, mm/s | FWHM, mm/s | RI |
|------------------------------|-----------------------|----------|----------|------------|----|
| <b>PGA-Fe<sup>III</sup>*</b> | Fe <sup>III</sup> (a) | 0.38     | 0.62     | 0.30       | 34 |
|                              | Fe <sup>III</sup> (b) | 0.39     | 1.10     | 0.44       | 48 |
|                              | Fe <sup>II</sup> (a)  | 0.97     | 2.16     | 0.53       | 7  |
|                              | Fe <sup>II</sup> (b)  | 1.34     | 2.28     | 0.52       | 12 |

Table S4 XPS parameters of compound **2** and basic zinc and magnesium polygalacturonates

| Compound          | Energy,<br>eV |                     |
|-------------------|---------------|---------------------|
| Compound <b>2</b> | 284.899       | C <sub>1s</sub>     |
|                   | 286.680       |                     |
|                   | 288.568       |                     |
| Mg(OH)PG          | 284.642       |                     |
|                   | 286.060       |                     |
|                   | 287.812       |                     |
| Zn(OH)PG          | 284.933       |                     |
|                   | 286.814       |                     |
|                   | 288.815       |                     |
| Compound <b>2</b> | 532.395       | O <sub>1s</sub>     |
| Mg(OH)PG          | 531.759       |                     |
|                   | 533.140       |                     |
| Zn(OH)PG          | 532.919       |                     |
| Compound <b>2</b> | 710.365       | Fe <sub>2p3/2</sub> |
|                   | 722.942       | Fe <sub>2p1/2</sub> |
|                   | 713.548       | Fe <sub>2p3/2</sub> |
|                   | 724.707       | Fe <sub>2p1/2</sub> |
| Mg(OH)PG          | 50.709        | Mg <sub>2p</sub>    |
| Zn(OH)PG          | 1022.698      | Zn <sub>2p3/2</sub> |
|                   | 1045.757      | Zn <sub>2p1/2</sub> |

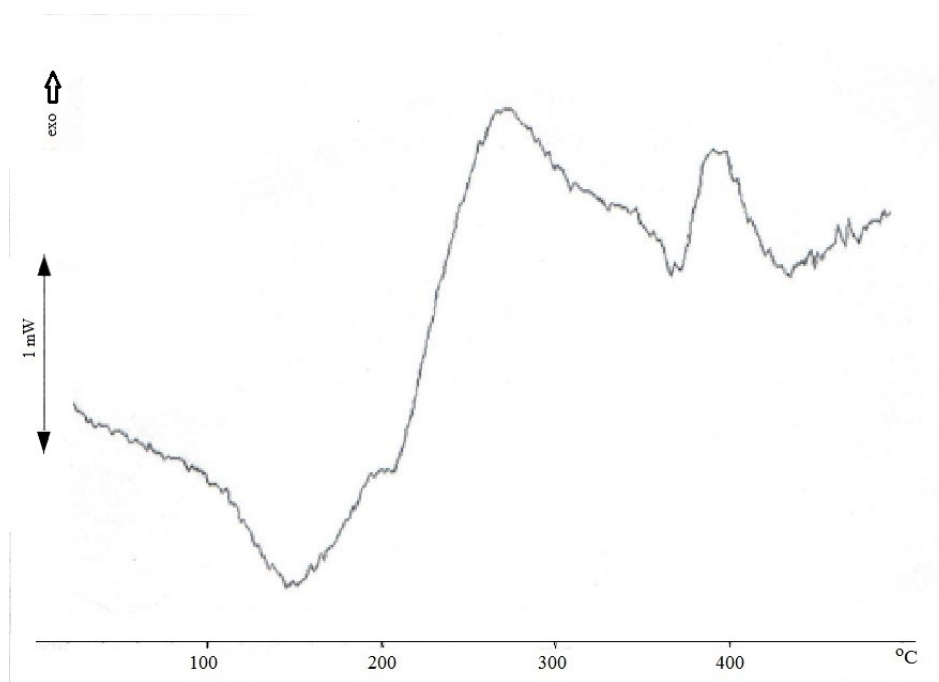

Figure S1 DSC curve of compound **2** under N<sub>2</sub>

a)

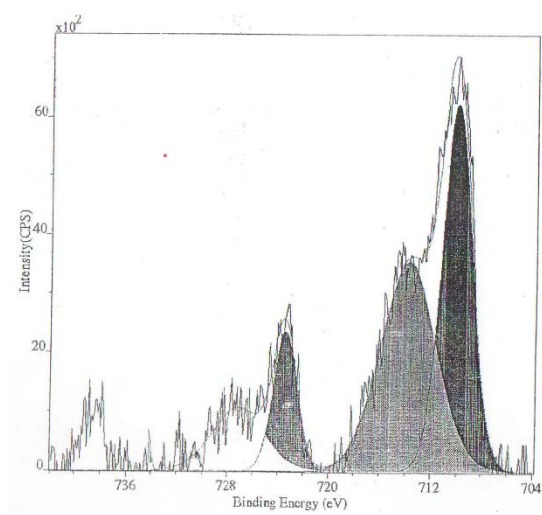

b)

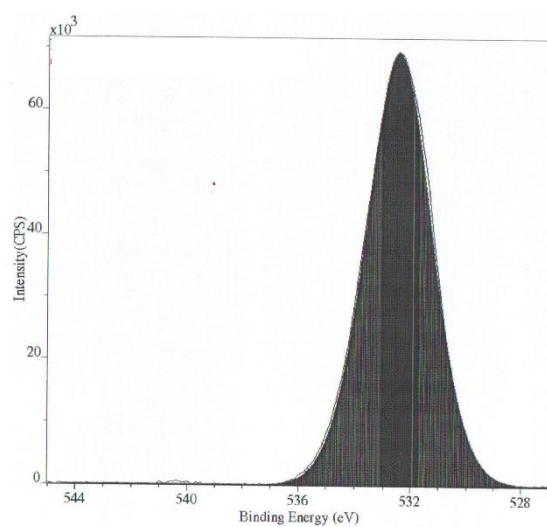

c)

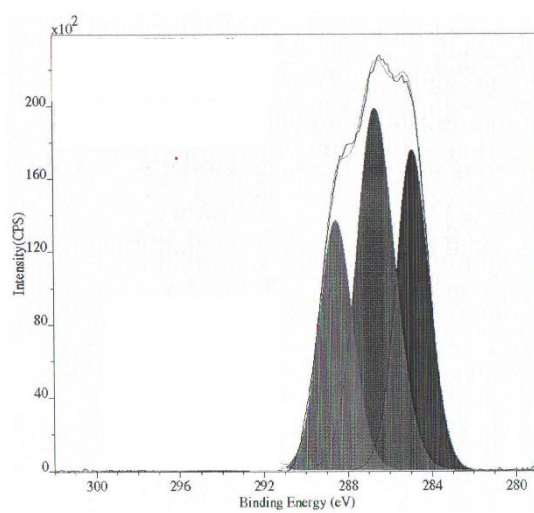

Figure S2 Fe 2p (a), O1s(b) and C1s (c) XPS spectra of compound 2.

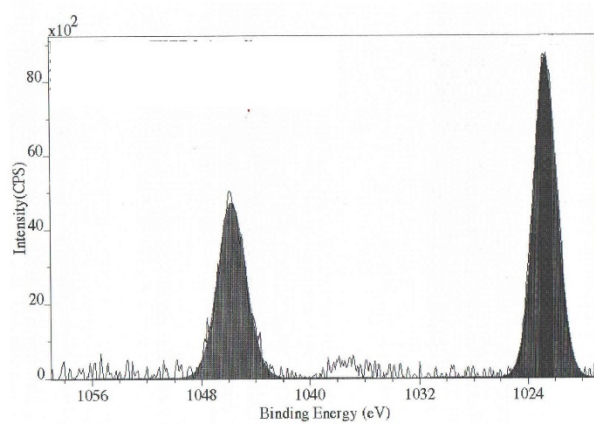

Figure S3 Zn 2p XPS spectrum of basic Zn polygalacturonate.

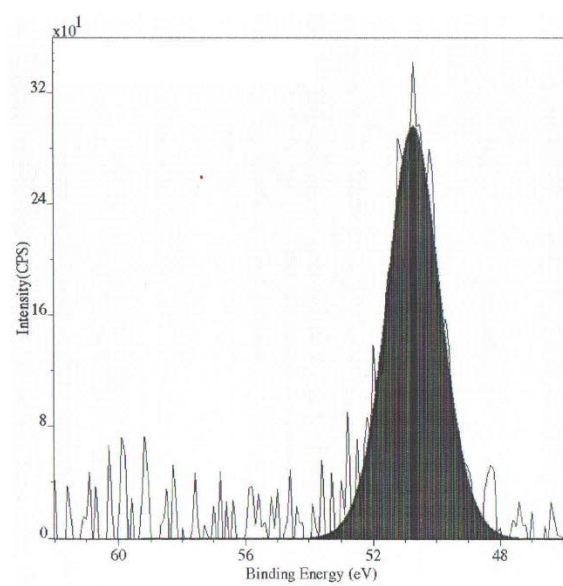

Figure S4 Mg 2p XPS spectrum of basic Mg polygalacturonate.

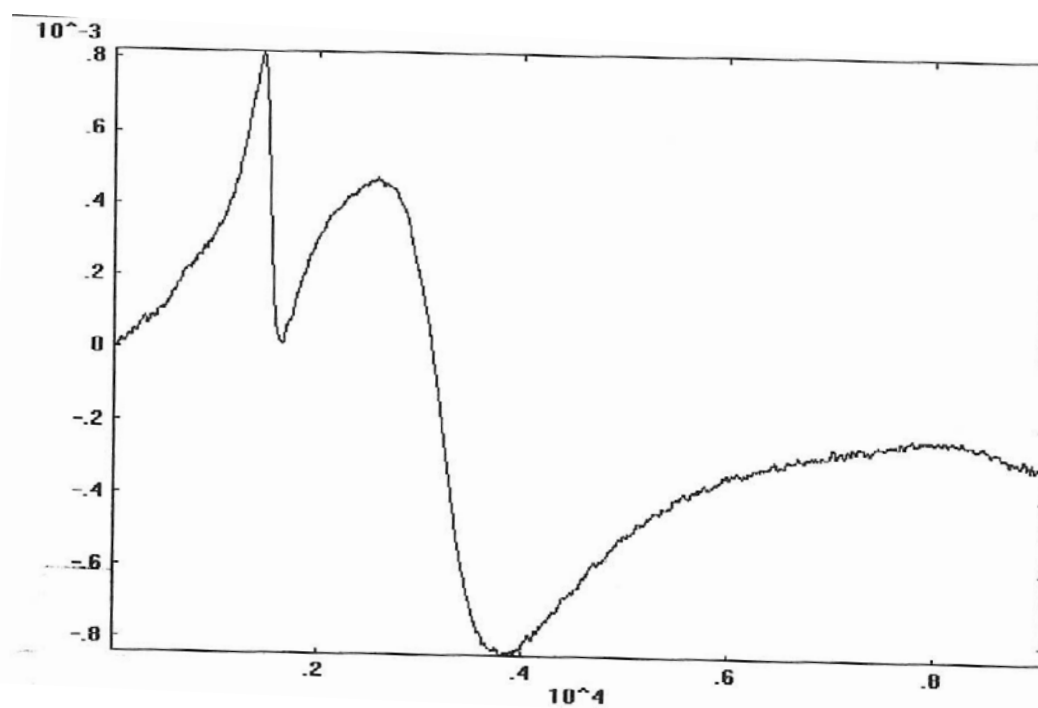

Figure S5 ESR spectrum of compound **2**.



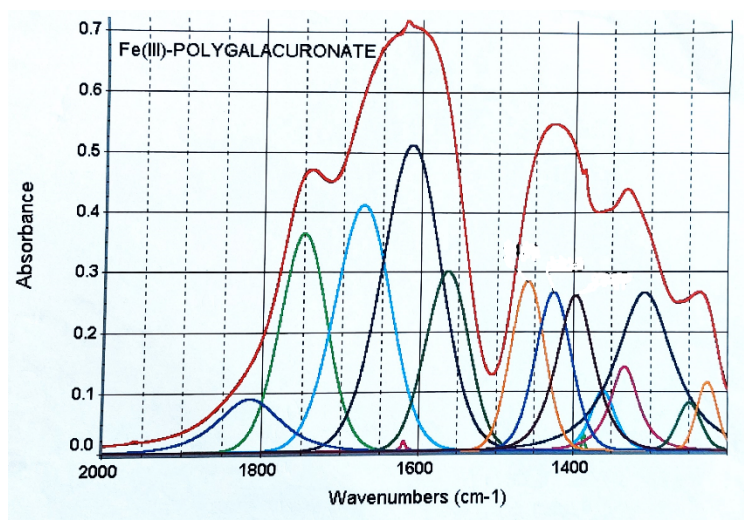

Figure S6 IR spectrum of compound **2** in the carboxylate region (different colors used to distinguish each spectral band component).

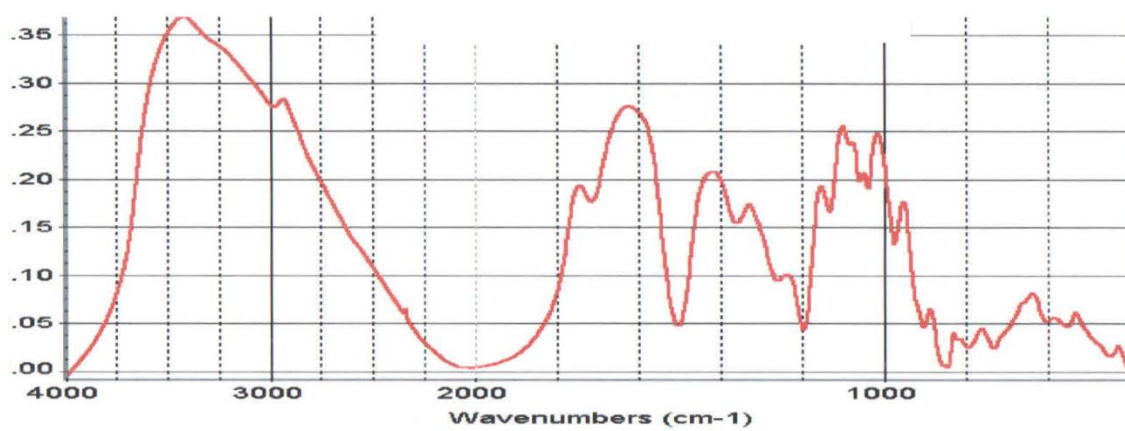

Figure S7 IR spectrum of compound 2 between 4000 and 400 cm<sup>-1</sup>.

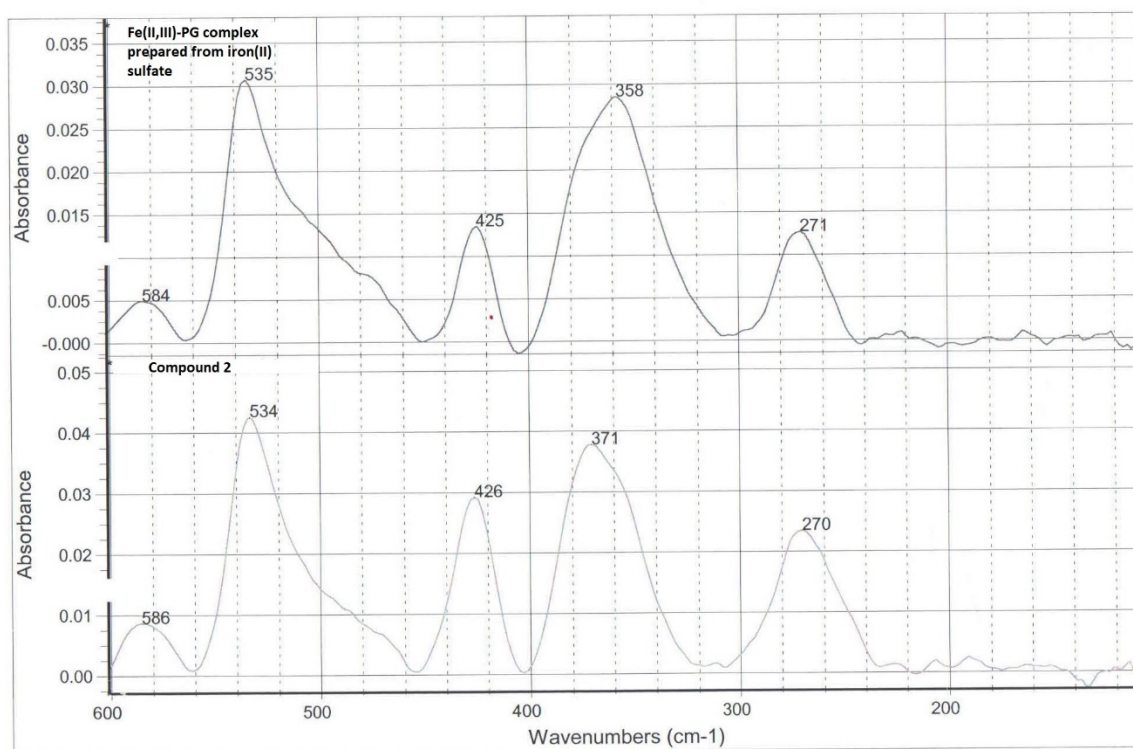

Figure S8 Far-IR spectra of a Fe(II,III) mixed valence polygalacturonate complex prepared from iron(II) sulfate and compound 1.
